# Supplementary material for: Biosurfactant Production Using Mutant Strains of Pseudomonas aeruginosa and Bacillus subtilis from Agro-industrial Wastes
Source: PubMed Central journal article supplement (PMC8421616; doi:10.34172/apb.2021.063), 2020-10-20
Supplement: apb-11-543-s001.pdf [file apb-11-543-s001.pdf]

## Biosurfactant Production Using Mutant Strains of *Pseudomonas aeruginosa* and *Bacillus subtilis* from Agro-industrial Wastes

**Supplementary Table 1.** Evaluation of biosurfactants produced by wild and mutant strains

| Sample   | Surface Tension (D/cm) | Emulsification Index (%) | Oil Displacement (mm) | Dry weight of biosurfactants (g/L) | P-value |
|----------|------------------------|--------------------------|-----------------------|------------------------------------|---------|
| PS2      | 38.25±0.32             | 50.05±1.03               | 23.38±0.98            | 0.878±0.61                         | 0.0*    |
| PS2mu    | 29.67±0.44             | 63.34±1.47               | 39.73±2.03            | 0.992±0.01                         | 0.0*    |
| BS3      | 34.12±1.12             | 57.17±0.32               | 28.21±1.21            | 0.905±1.04                         | 0.0*    |
| BS3mu    | 25.96±0.38             | 65.73±0.65               | 45.66±0.58            | 1.112±0.11                         | 0.0*    |
| Tween 80 | 20.19±1.18             | 51.17±2.03               | 27.96±1.20            | NA                                 | 0.0*    |

All data were statistically described in terms of mean and standard error ( $\pm$ S. E); \*, represent highly significant difference ( $P < 0.001$ )

**Supplementary Table 2.** Antimicrobial activity of the biosurfactants

| Isolates |                              | Inhibition zone diameter (mm) at different concentrations (mg/L) |      |      |      |      |       |    |    |
|----------|------------------------------|------------------------------------------------------------------|------|------|------|------|-------|----|----|
|          |                              | 0                                                                | 10.2 | 20.4 | 30.6 | 61.2 | 122.4 | PC | NC |
| Bacteria | <i>Escherichia coli</i>      | N                                                                | N    | N    | N    | 8    | 11    | 25 | N  |
|          | <i>Salmonella</i>            | N                                                                | N    | N    | N    | 6    | 14    | 20 | N  |
|          | <i>Shigellae</i> spp         | N                                                                | N    | N    | N    | N    | N     | 17 | N  |
|          | <i>Listeria</i> spp          | N                                                                | N    | N    | N    | N    | N     | 21 | N  |
|          | <i>Vibrio</i> spp            | N                                                                | N    | N    | N    | N    | N     | 18 | N  |
|          | <i>Staphylococcus aureus</i> | N                                                                | N    | N    | N    | N    | N     | 22 | N  |
| Fungi    | <i>Aspergillus niger</i>     | N                                                                | N    | N    | N    | N    | N     | 31 | N  |
|          | <i>Aspergillus flavus</i>    | N                                                                | N    | N    | N    | N    | N     | 36 | N  |
|          | <i>Candida albicans</i>      | N                                                                | N    | N    | N    | N    | N     | 34 | N  |

Diameters are recorded as mean values of triplicate measurements

**KEY:**

N: No zone of inhibition

Positive Control (PC): Gentamicin (10  $\mu$ g) for Bacteria; Clotrimazole (50  $\mu$ g) for Fungi

Negative Control (NC): Dimethyl Sulfoxide (DMSO) (5 mm) for both bacteria and fungi
